# Supplementary material for: A potentially low-cost modified sawdust (MSD) effective for rapid Cr(vi) and As(v) removal from water
Source: Royal Society of Chemistry journal article supplement (doi:10.1039/c4ra07395a), 2014-01-01
Supplement: c4ra07395a1.pdf [file c4ra07395a1.pdf]

## The raw pine sawdust

### Summary Report

#### Surface Area

Single point surface area at  $P/P_0 = 0.200312783$ : 0.1406 m<sup>2</sup>/g

BET Surface Area: 0.1224 m<sup>2</sup>/g

Langmuir Surface Area: 0.1500 m<sup>2</sup>/g

t-Plot Micropore Area: 0.9102 m<sup>2</sup>/g

t-Plot External Surface Area: -0.7878 m<sup>2</sup>/g

#### Pore Volume

t-Plot micropore volume: 0.000397 cm<sup>3</sup>/g

## MSD

### Summary Report

#### Surface Area

Single point surface area at  $P/P_0 = 0.200504571$ : 0.1449 m<sup>2</sup>/g

BET Surface Area: 0.1564 m<sup>2</sup>/g

Langmuir Surface Area: 0.2213 m<sup>2</sup>/g

t-Plot Micropore Area: 0.0248 m<sup>2</sup>/g

t-Plot External Surface Area: 0.1317 m<sup>2</sup>/g

BJH Adsorption cumulative surface area of pores  
between 17.000 Å and 3000.000 Å diameter: 0.068 m<sup>2</sup>/g

BJH Desorption cumulative surface area of pores  
between 17.000 Å and 3000.000 Å diameter: 0.1503 m<sup>2</sup>/g

Fig. S1. The summary reports of surface areas of the raw sawdust and MSD.

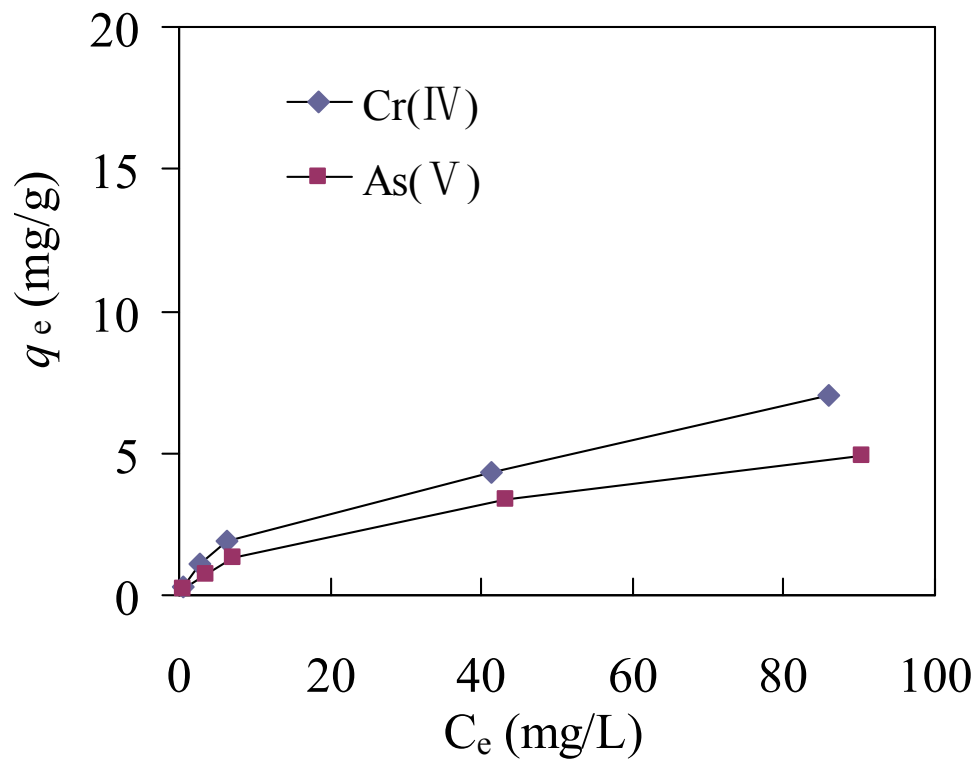

Fig. S2. Adsorption isotherms for Cr(VI) and As(V) by the raw sawdust. (raw sawdust dosage 0.2g, pH  $7.0 \pm 0.2$ , temperature  $25 \pm 2$  °C)

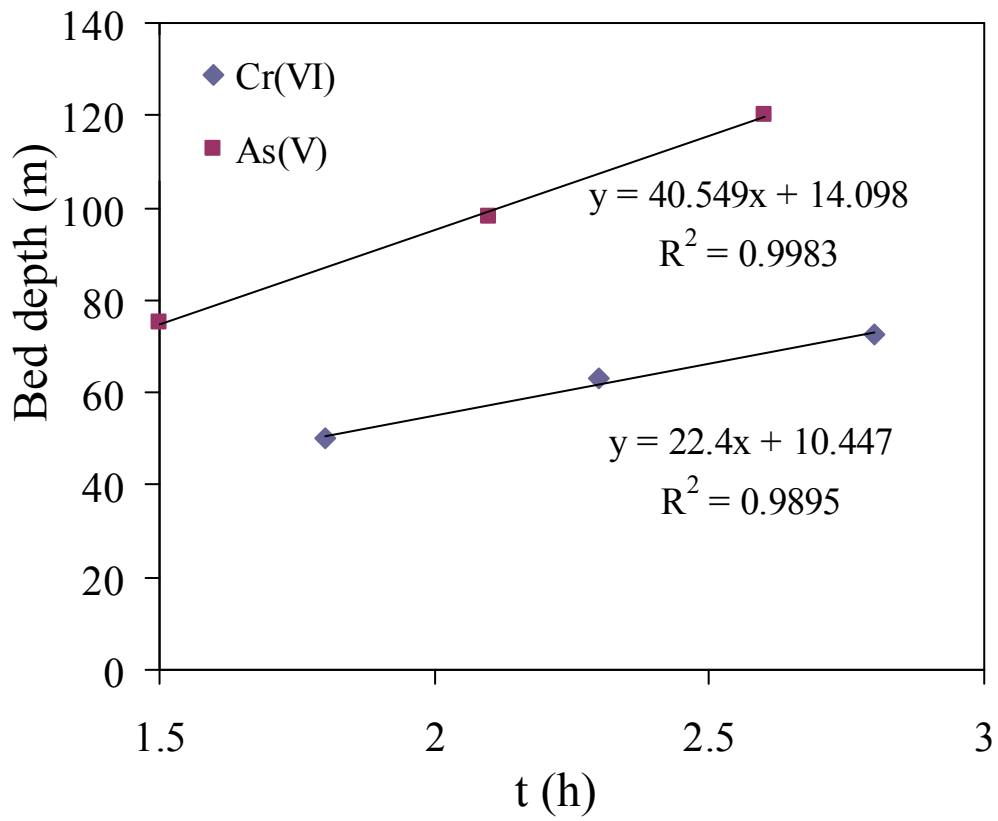

Fig. S3. The linearized BDST model for Cr(VI) and As(V) adsorption by MSD.
